# Supplementary material
Source: publisher site journal article supplement (https://www.dovepress.com/article/347830)
Supplement: Supplementary file 1 [file get_supplementary_file.php]

Supplementary Table 1: Hardy-Weinberg equilibrium results

| SNP | Studied population (N =7 68)  P-value | T2DM group (N = 376)  P-value | T2DM-control group (N = 392)  P-value | MetS group (N = 239)  P-value | MetS-control group (N = 529)  P-value |
| --- | --- | --- | --- | --- | --- |
| rs266729 | 1.00 | 0.52 | 0.40 | 0.16 | 0.24 |
| rs1501299 | 0.48 | 0.54 | 0.80 | 0.54 | 0.74 |
| rs3774261 | 0.33 | 0.67 | 0.34 | 0.43 | 0.052 |
| rs822393 | 0.37 | 0.67 | 0.39 | 0.79 | 0.14 |

Supplementary Table 2: Codominant model analysis of SNPs for T2DM.

| SNP | Genotype | Controls (n) | Cases (n) | Crude OR (95% CI) | *P*-value | Adjusted OR (95% CI)† | *P*-value† |
| --- | --- | --- | --- | --- | --- | --- | --- |
| rs266729 | C/C | 226 | 198 | 1 | 0.064 | 1 | 0.049* |
| C/G | 148 | 146 | 1.13 (0.84-1.52) | 1.16 (0.84-1.61) |
| G/G | 18 | 32 | 2.03 (1.10-3.73) | 2.30 (1.16-4.58) |
| rs1501299 | G/G | 210 | 184 | 1 | 0.41 | 1 | 0.2 |
| G/T | 156 | 162 | 1.19 (0.88-1.59) | 1.34 (0.97-1.86) |
| T/T | 26 | 30 | 1.32 (0.75-2.31) | 1.05 (0.57-1.93) |
| rs3774261 | A/A | 144 | 124 | 1 | 0.31 | 1 | 0.6 |
| A/G | 195 | 188 | 1.12 (0.82-1.53) | 1.17 (0.83-1.66) |
| G/G | 53 | 64 | 1.40 (0.91-2.17) | 1.21 (0.75-1.95) |
| rs822393 | C/C | 143 | 123 | 1 | 0.31 | 1 | 0.22 |
| C/T | 195 | 188 | 1.12 (0.82-1.53) | 1.09 (0.78-1.54) |
| T/T | 54 | 65 | 1.40 (0.91-2.16) | 1.53 (0.95-2.47) |

† *Adjusted for sex, age, and BMI.*

*OR: odds ratio, CI: confidence interval. N = 768.*

**Statistically significant*

Supplementary Table 3**:** Dominant model analysis of SNPs for T2DM.

| SNP | Genotype | Controls (n) | Cases (n) | Crude OR (95% CI) | *P*-value | Adjusted OR (95% CI)† | *P*-value† |
| --- | --- | --- | --- | --- | --- | --- | --- |
| rs266729 | C/C | 226 | 198 | 1 | 0.16 | 1 | 0.13 |
| C/G, G/G | 166 | 178 | 1.22 (0.92-1.63) | 1.27 (0.93-1.74) |
| rs1501299 | G/G | 210 | 184 | 1 | 0.2 | 1 | 0.11 |
| G/T, T/T | 182 | 192 | 1.20 (0.91-1.60) | 1.29 (0.95-1.76) |
| rs3774261 | A/A | 144 | 124 | 1 | 0.27 | 1 | 0.32 |
| A/G, G/G | 248 | 252 | 1.18 (0.88-1.59) | 1.18 (0.85-1.64) |
| rs822393 | C/C | 143 | 123 | 1 | 0.27 | 1 | 0.31 |
| C/T, T/T | 249 | 253 | 1.18 (0.88-1.59) | 1.18 (0.85-1.64) |

† *Adjusted for sex, age, and BMI.*

*OR: odds ratio, CI: confidence interval. N = 768.*

Supplementary Table 4**:** Recessive model analysis of SNPs for T2DM.

| SNP | Genotype | Controls (n) | Cases (n) | Crude OR (95% CI) | *P*-value | Adjusted OR (95% CI)† | *P*-value† |
| --- | --- | --- | --- | --- | --- | --- | --- |
| rs266729 | C/C, C/G | 374 | 344 | 1 | 0.027* | 1 | 0.022* |
| G/G | 18 | 32 | 1.93 (1.07-3.51) | 2.17 (1.11-4.26) |
| rs1501299 | G/G, G/T | 366 | 346 | 1 | 0.47 | 1 | 0.79 |
| T/T | 26 | 30 | 1.22 (0.71-2.11) | 0.92 (0.51-1.67) |
| rs3774261 | A/A, A/G | 339 | 312 | 1 | 0.18 | 1 | 0.68 |
| G/G | 53 | 64 | 1.31 (0.88-1.95) | 1.10 (0.71-1.51) |
| rs822393 | C/C, C/T | 338 | 311 | 1 | 0.18 | 1 | 0.094 |
| T/T | 54 | 65 | 1.31 (0.88-1.94) | 1.45 (0.94-2.25) |

† *Adjusted for sex, age, and BMI.*

*OR: odds ratio, CI: confidence interval. N = 768.*

**Statistically significant*

Supplementary Table 5**:** Log-additive model analysis of SNPs for T2DM.

| SNP | Crude OR  (95% CI) | *P*-value | Adjusted OR (95% CI)† | *P*-value† |
| --- | --- | --- | --- | --- |
| rs266729 | 1.27 (1.00-1.59) | 0.045* | 1.32 (1.02-1.70) | 0.034* |
| rs1501299 | 1.16 (0.93-1.46) | 0.19 | 1.16 (0.90-1.49) | 0.24 |
| rs3774261 | 1.17 (0.95-1.44) | 0.14 | 1.11 (0.89-1.40) | 0.36 |
| rs822393 | 1.17 (0.95-1.44) | 0.14 | 1.20 (0.96-0.151) | 0.11 |

† *Adjusted for sex, age, and BMI.*

*OR: odds ratio, CI: confidence interval. N = 768.*

**Statistically significant*

Supplementary Table 6: Codominant model analysis of SNPs for MetS.

| SNP | Genotype | Controls (n) | Cases (n) | Crude OR (95% CI) | *P*-value | Adjusted OR (95% CI)† | *P*-value† |
| --- | --- | --- | --- | --- | --- | --- | --- |
| rs266729 | C/C | 298 | 126 | 1 | 0.036* | 1 | 0.053 |
| C/G | 205 | 89 | 1.03 (0.74-1.42) | 0.95 (0.67-1.36) |
| G/G | 26 | 24 | 2.18 (1.21-3.95) | 2.20 (1.13-4.31) |
| rs1501299 | G/G | 279 | 115 | 1 | 0.49 | 1 | 0.51 |
| G/T | 213 | 105 | 1.20 (0.87-1.65) | 1.23 (0.87-1.74) |
| T/T | 37 | 19 | 1.25 (0.69-2.26) | 1.10 (0.58-2.09) |
| rs3774261 | A/A | 193 | 75 | 1 | 0.0041* | 1 | 0.035* |
| A/G | 271 | 112 | 1.06 (0.75-1.50) | 1.02 (0.70-1.49) |
| G/G | 65 | 52 | 2.06 (1.31-3.23) | 1.82 (1.11-2.98) |
| rs822393 | C/C | 189 | 77 | 1 | 0.1 | 1 | 0.11 |
| C/T | 268 | 115 | 1.05 (0.75-1.48) | 0.96 (0.66-1.39) |
| T/T | 72 | 47 | 1.60 (1.02-2.52) | 1.58 (0.96-2.60) |

† *Adjusted for sex, age, and BMI.*

*OR: odds ratio, CI: confidence interval. N = 768.*

**Statistically significant*

Supplementary Table 7**:** Dominant model analysis of SNPs for MetS.

| SNP | Genotype | Controls (n) | Cases (n) | Crude OR (95% CI) | *P*-value | Adjusted OR (95% CI)† | *P*-value† |
| --- | --- | --- | --- | --- | --- | --- | --- |
| rs266729 | C/C | 298 | 126 | 1 | 0.35 | 1 | 0.64 |
| C/G, G/G | 231 | 113 | 1.16 (0.85-1.57) | 1.08 (0.78-1.51) |
| rs1501299 | G/G | 279 | 115 | 1 | 0.24 | 1 | 0.27 |
| G/T, T/T | 250 | 124 | 1.20 (0.89-1.63) | 1.21 (0.86-1.68) |
| rs3774261 | A/A | 193 | 75 | 1 | 0.17 | 1 | 0.35 |
| A/G, G/G | 336 | 164 | 1.26 (0.91-1.74) | 1.19 (0.83-1.69) |
| rs822393 | C/C | 189 | 77 | 1 | 0.34 | 1 | 0.65 |
| C/T, T/T | 340 | 162 | 1.17 (0.85-1.62) | 1.08 (0.76-1.54) |

† *Adjusted for sex, age, and BMI.*

*OR: odds ratio, CI: confidence interval. N = 768.*

Supplementary Table 8**:** Recessive model analysis of SNPs for MetS.

| SNP | Genotype | Controls (n) | Cases (n) | Crude OR (95% CI) | *P*-value | Adjusted OR (95% CI) † | *P*-value† |
| --- | --- | --- | --- | --- | --- | --- | --- |
| rs266729 | C/C, C/G | 503 | 215 | 1 | 0.009* | 1 | 0.016* |
| G/G | 26 | 24 | 2.16 (1.21-3.85) | 2.25 (1.17-4.32) |
| rs1501299 | G/G, G/T | 492 | 220 | 1 | 0.64 | 1 | 1 |
| T/T | 37 | 19 | 1.15 (0.65-2.04) | 1 (0.54-1.87) |
| rs3774261 | A/A, A/G | 464 | 187 | 1 | 0.001* | 1 | 0.009* |
| G/G | 65 | 52 | 1.99 (1.33-2.97) | 1.79 (1.16-2.78) |
| rs822393 | C/C, C/T | 457 | 192 | 1 | 0.035* | 1 | 0.037* |
| T/T | 72 | 47 | 1.55 (1.04-2.33) | 1.62 (1.03-2.53) |

† *Adjusted for sex, age, and BMI.*

*OR: odds ratio, CI: confidence interval. N = 768.*

**Statistically significant*

Supplementary Table 9**:** Log-additive model analysis of SNPs for MetS.

| SNP | Crude OR  (95% CI) | *P*-value | Adjusted OR (95% CI)† | *P*-value† |
| --- | --- | --- | --- | --- |
| rs266729 | 1.25 (0.98-1.60) | 0.07 | 1.20 (0.92-1.58) | 0.18 |
| rs1501299 | 1.15 (0.65-2.04) | 0.64 | 1.12 (0.87-1.70) | 0.26 |
| rs3774261 | 1.37 (1.09-1.71) | 0.006* | 1.29 (1.01-1.65) | 0.04* |
| rs822393 | 1.23 (0.98-1.54) | 0.072 | 1.20 (0.94-1.53) | 0.15 |

† *Adjusted for sex, age, and BMI.*

*OR: odds ratio, CI: confidence interval. N = 768.*

**Statistically significant*
